# Supplementary material
Source: publisher figshare collection journal article supplement (https://acs.figshare.com/ndownloader/files/4264117)

Figure 1.

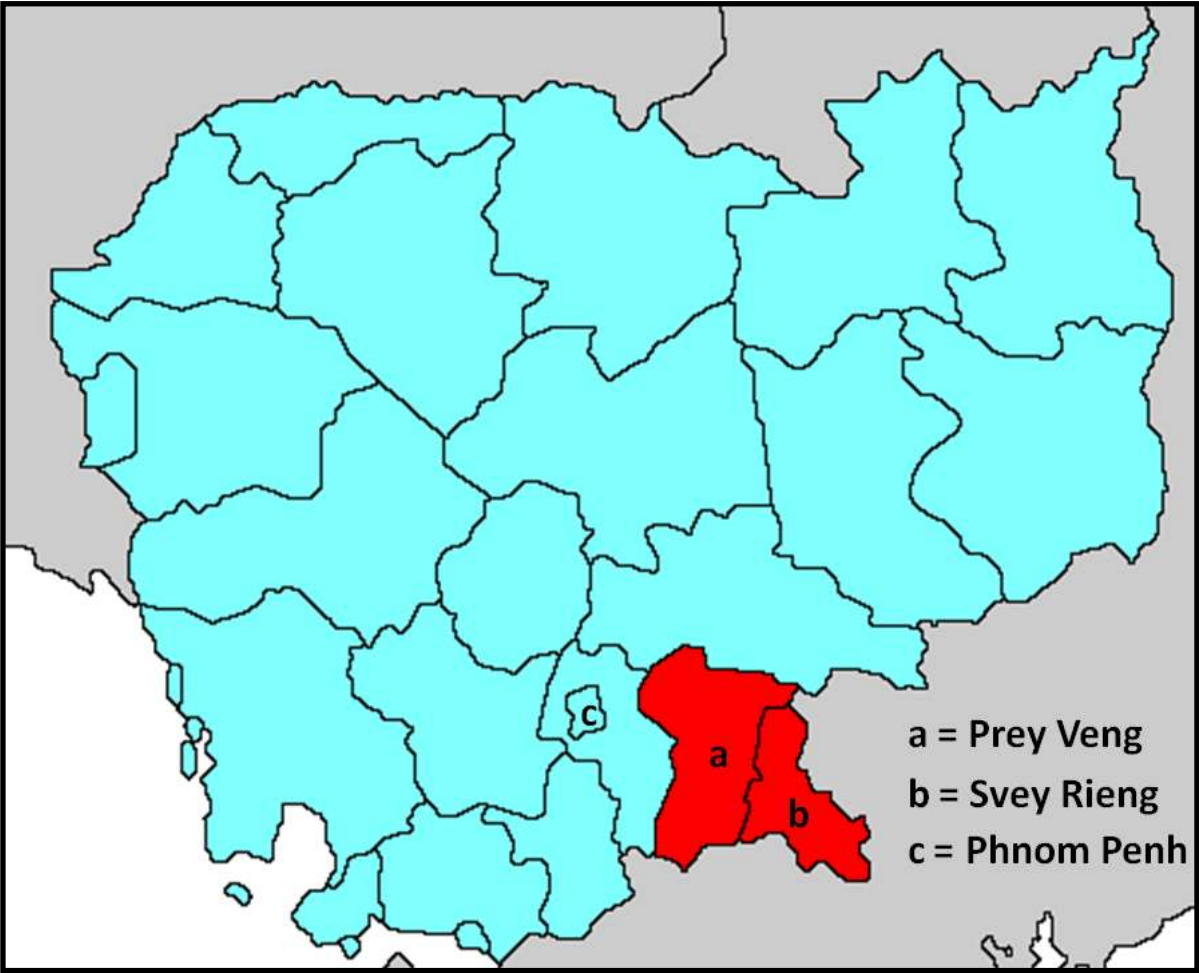

Figure 2

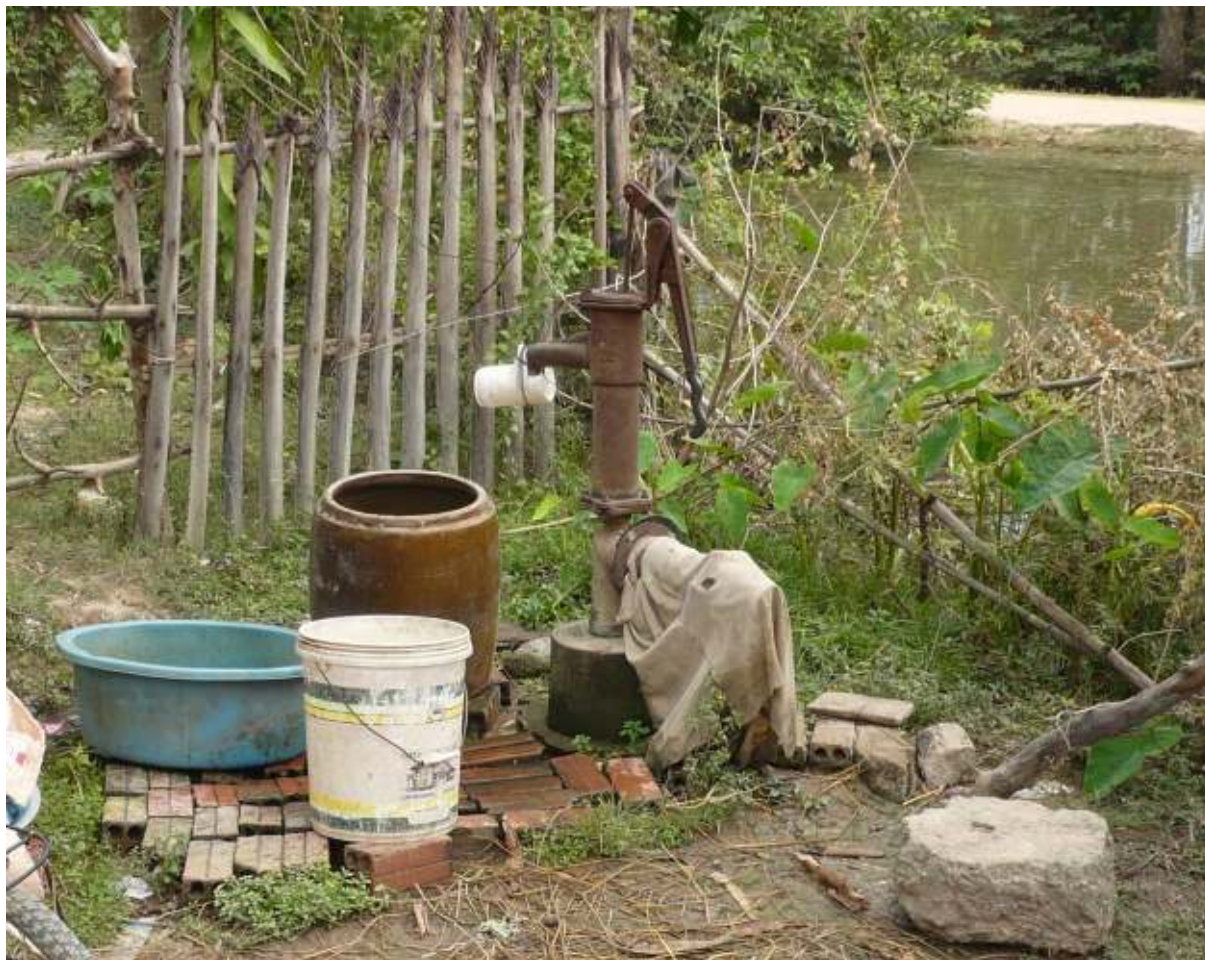

Figure 3

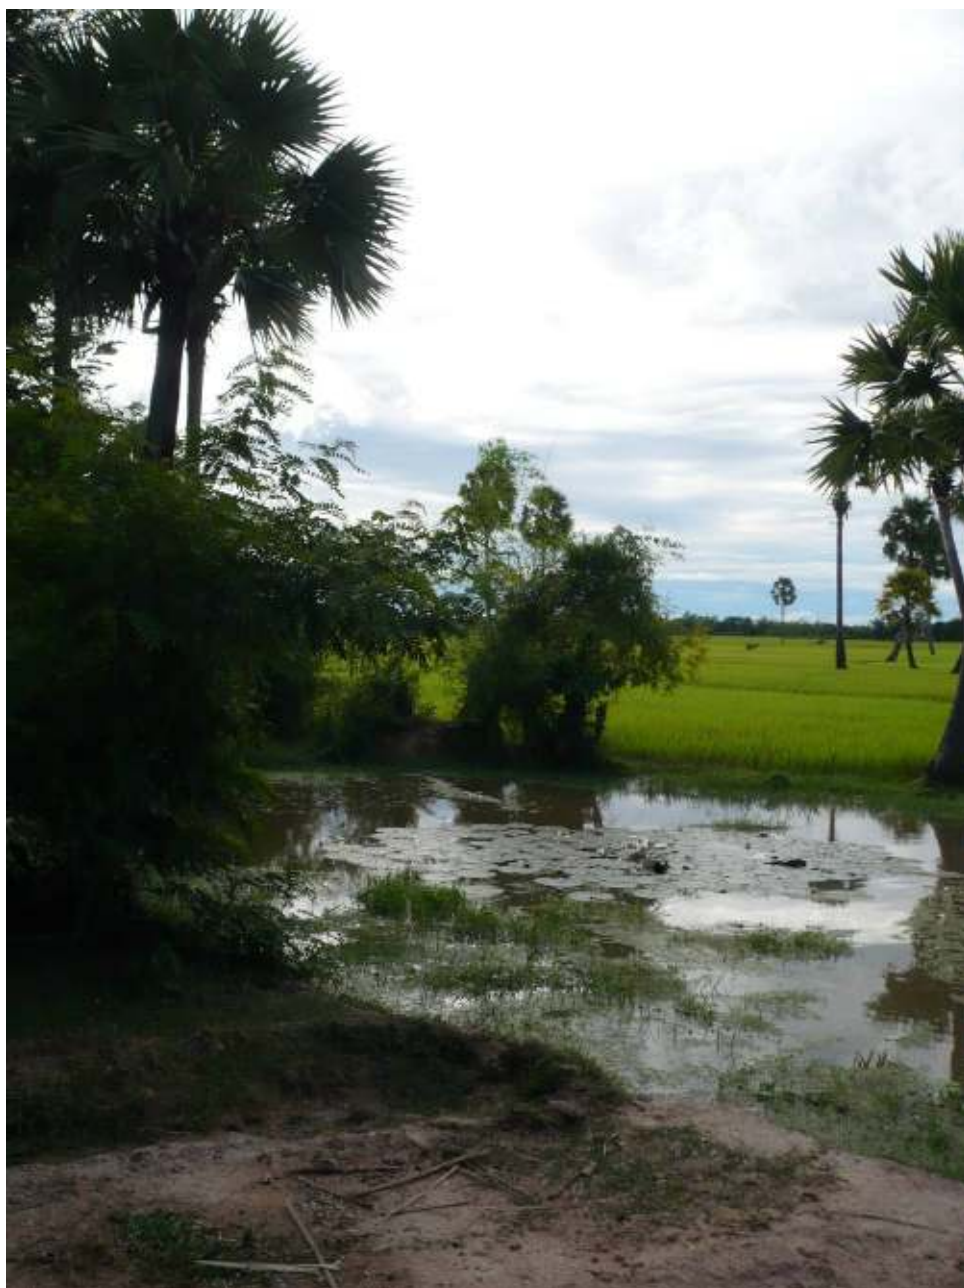



Figure 4

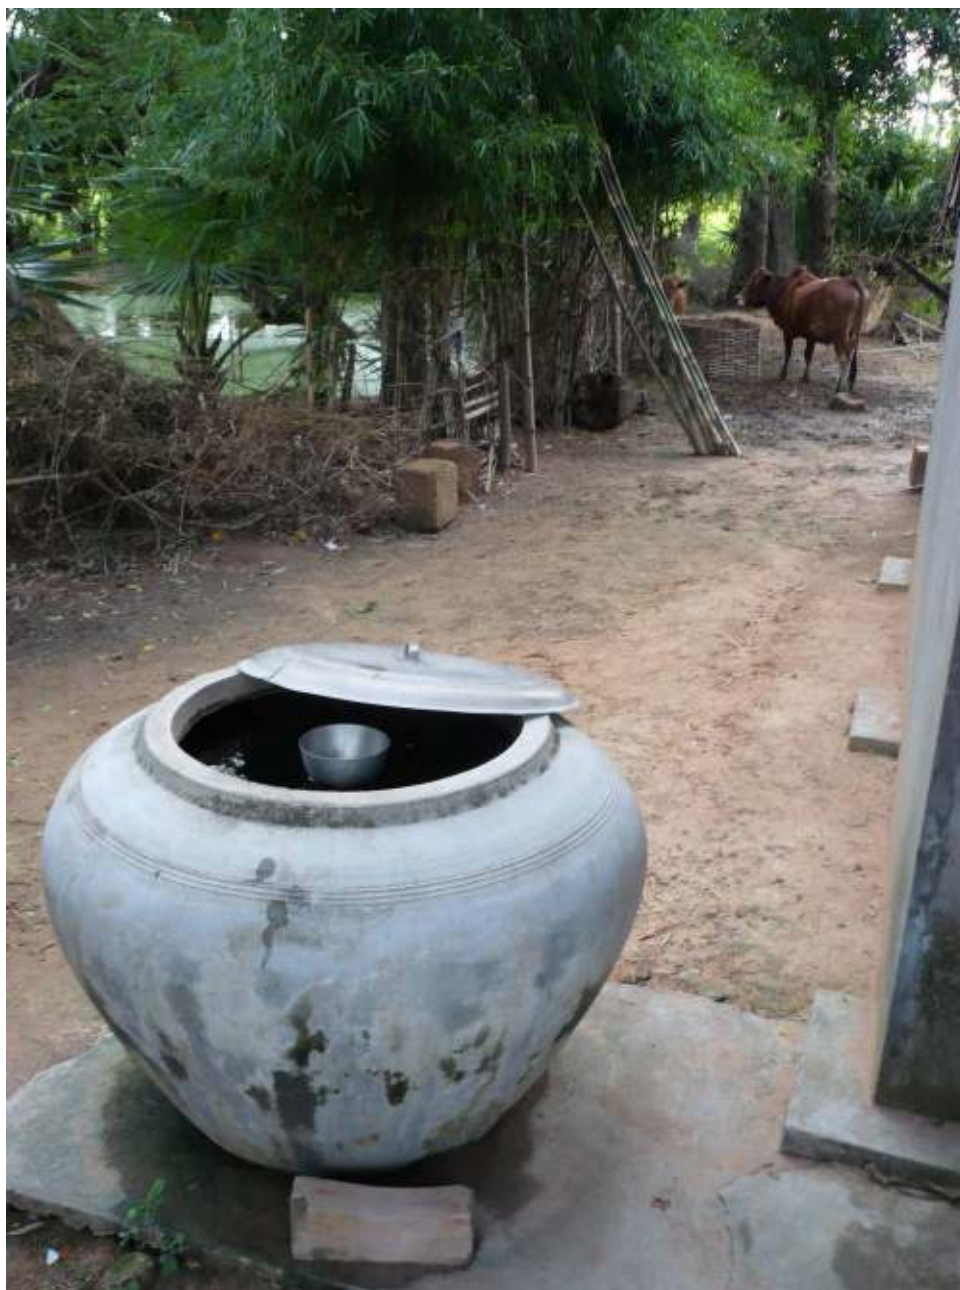

Figure 5

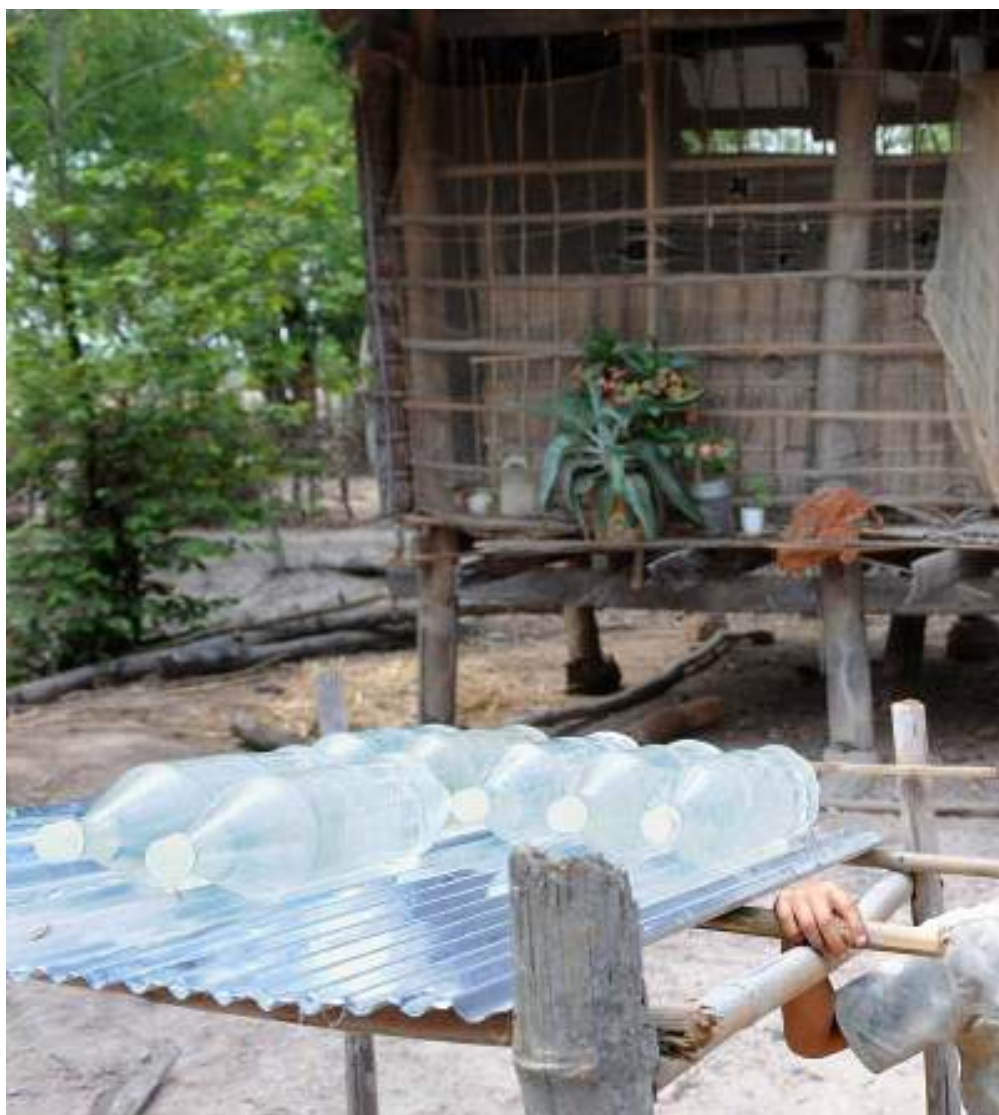

Supplement: Supplementary file 1 [file 4264117]
